# Supplementary material for: PERSIST platform provides programmable RNA regulation using CRISPR endoRNases
Source: PubMed Central journal article supplement (PMC9095627; doi:10.1038/s41467-022-30172-3), 2022-05-11
Supplement: 41467_2022_30172_MOESM4_ESM.pdf [file 41467_2022_30172_MOESM4_ESM.pdf]

Title: Supplementary Data 1

Description: This file includes sequences of plasmid parts and a list of all plasmids used in the study with associated descriptions.
